# Supplementary material for: Defining the Hoxb8 cell lineage during murine definitive hematopoiesis
Source: Oxford University Press journal article supplement (doi:10.1242/dev.200200), 2022-04-15
Supplement: dev200200supp.pdf [file dev200200supp.pdf]

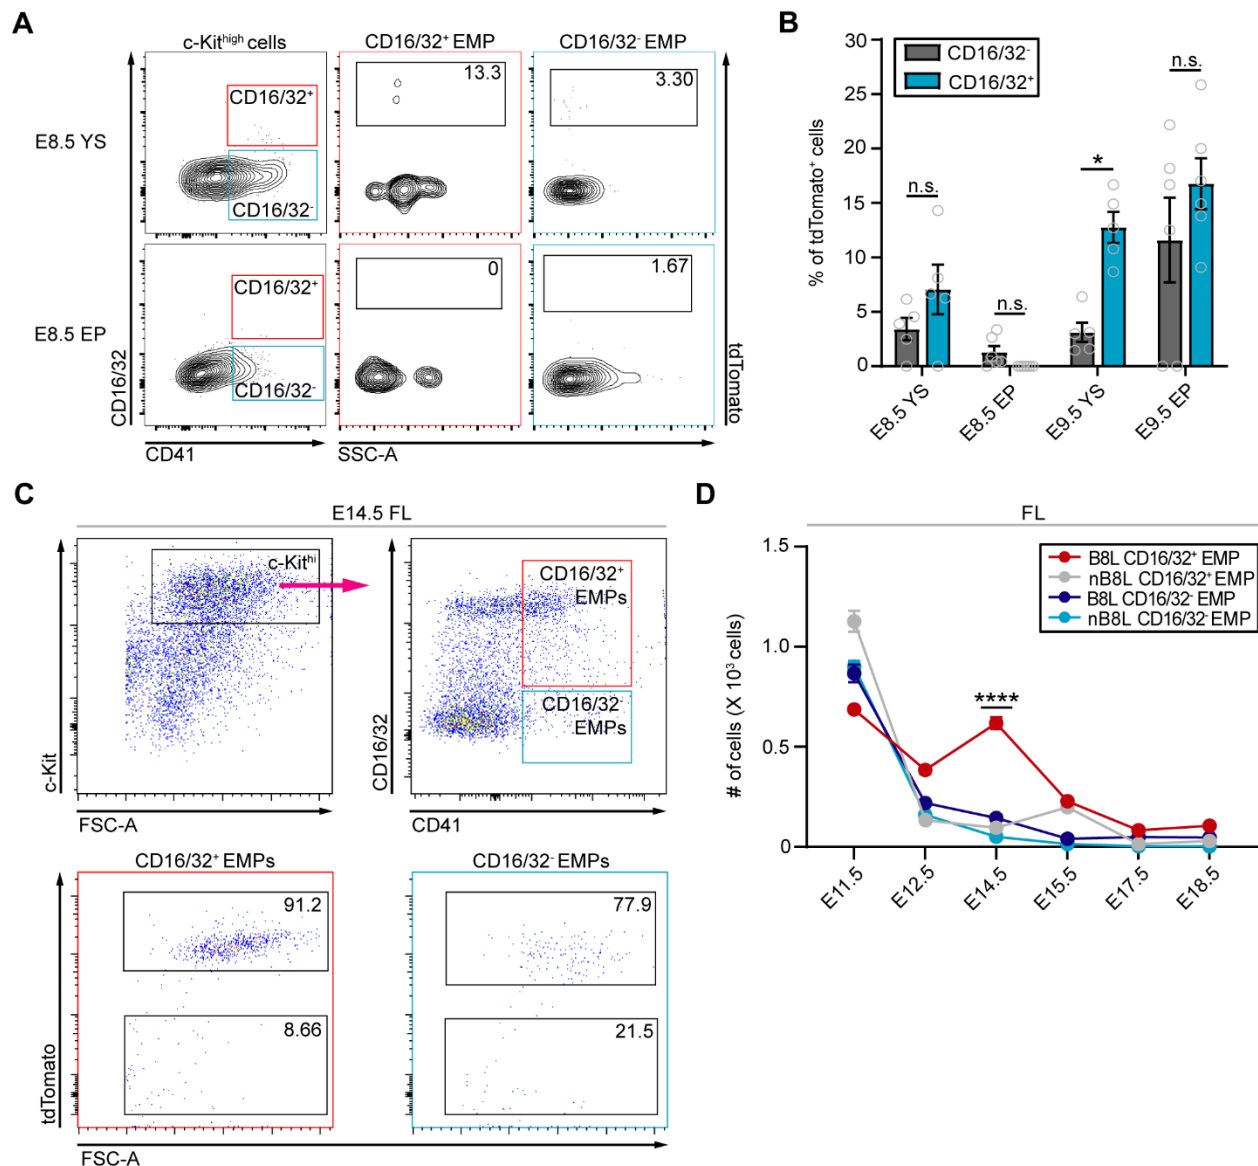

**Fig. S1. Characterization of *Hoxb8*  $CD16/32^-$  and  $CD16/32^+$  EMPs during development.** (A)

Representative flow cytometry plots of  $CD16/32^-$  and  $CD16/32^+$  EMPs (c-Kit<sup>high</sup> CD41<sup>+</sup>) gated

for tdTomato from E8.5 yolk sac (YS) and embryo proper (EP). (B) Percentage of tdTomato<sup>+</sup>

cells in the  $CD16/32^-$  and  $CD16/32^+$  EMP populations in E8.5 and E9.5 YS and EP. 2-way

ANOVA with posthoc analysis comparing  $CD16/32^-$  EMPs –  $CD16/32^+$  EMPs. E8.5 YS (n=5

pooled biological replicates):  $p=0.7001$ , E8.5 EP (n=6 biological replicates):  $p=0.9862$ , E9.5 YS

(n=5 biological replicates):  $p=0.0255$ , E9.5 EP (n=6 biological replicates):  $p=0.3033$ . (C)

Representative gating strategy of  $CD16/32^-$  and  $CD16/32^+$  EMPs (c-Kit<sup>hi</sup> CD41<sup>+</sup>) gated for

tdTomato from E14.5 fetal liver (FL). **(D)** Number of tdTomato<sup>+</sup> (B8L) and tdTomato<sup>-</sup> (nB8L) cells in the CD16/32<sup>-</sup> and CD16/32<sup>+</sup> EMP populations during fetal liver development. E11.5 FL, E12.5 FL, E14.5 FL, E18.5 FL: n=6 biological replicates. E15.5 FL, E17.5 FL: n=5 biological replicates. 2-way ANOVA with posthoc analysis, note that only the statistical analysis comparing B8L CD16/32<sup>+</sup> EMPs to all other EMP populations at E14.5 is shown:  $p < 0.0001$ . Data are represented as mean $\pm$ sem. n.s. non-significant, \* $p < 0.05$ , \*\*\*\* $p < 0.0001$ . Data represented in all graphs are from two to three independent experiments per time point.

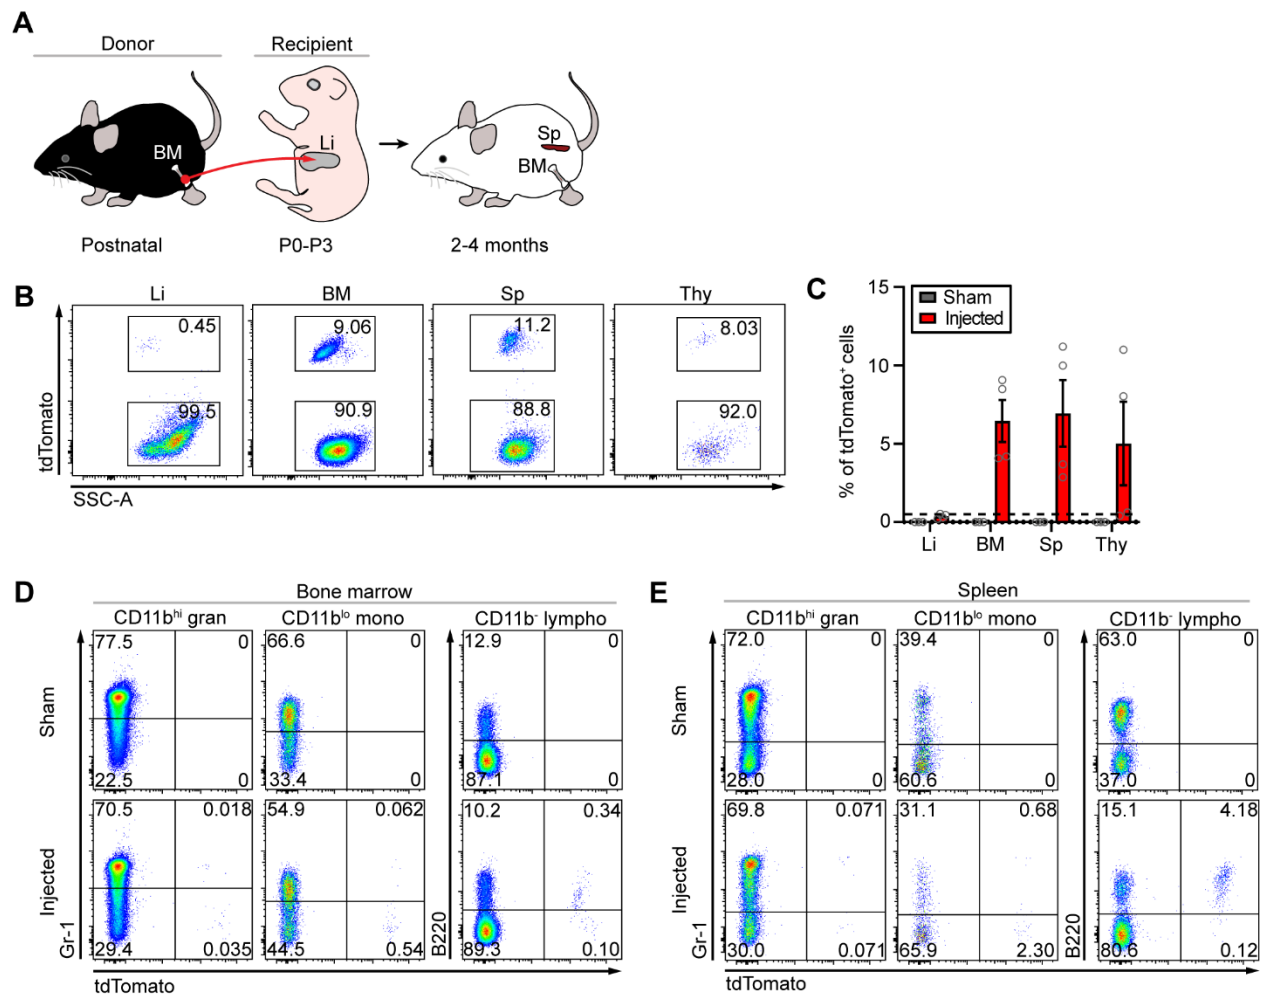

**Fig. S2. *Hoxb8* HSCs have multilineage hematopoietic capacity.** (A) Illustration showing the intra-hepatic injection of postnatal bone marrow (BM)-derived HSCs into a liver of a neonatal (P0-P3) recipient mouse that lacks a functional immune system (NBSGW). Liver (Li), Spleen (Sp), Thymus (Thy), and BM were harvested 2-4 months following transplantation. (B) Representative flow cytometry plots showing the total percentage of donor-derived tdTomato<sup>+</sup> and endogenous tdTomato<sup>-</sup> live cells in the examined tissues. (C) Percentage of donor-derived tdTomato<sup>+</sup> cells in examined tissues. n=3 biological replicates (sham injected) and n=4 biological replicates (cell injected). Gray circles represent individual data points. Data are represented as mean±sem. The dotted line marks the minimum threshold for transplantation efficiency (>0.1%). Note that >5% of donor-derived tdTomato<sup>+</sup> cells were detected in

hematopoietic/lymphoid tissues in adult mice. **(D-E)** Representative flow cytometry plots showing CD11b<sup>hi</sup> granulocytes (gran), CD11b<sup>lo</sup> monocytes (mono), and CD11b<sup>+</sup> lymphocytes (lympho) gated for tdTomato and Gr-1 in **(D)** bone marrow and **(E)** spleens of sham-injected and cell-injected recipient mice. Data represented in all graphs are from two independent experiments.

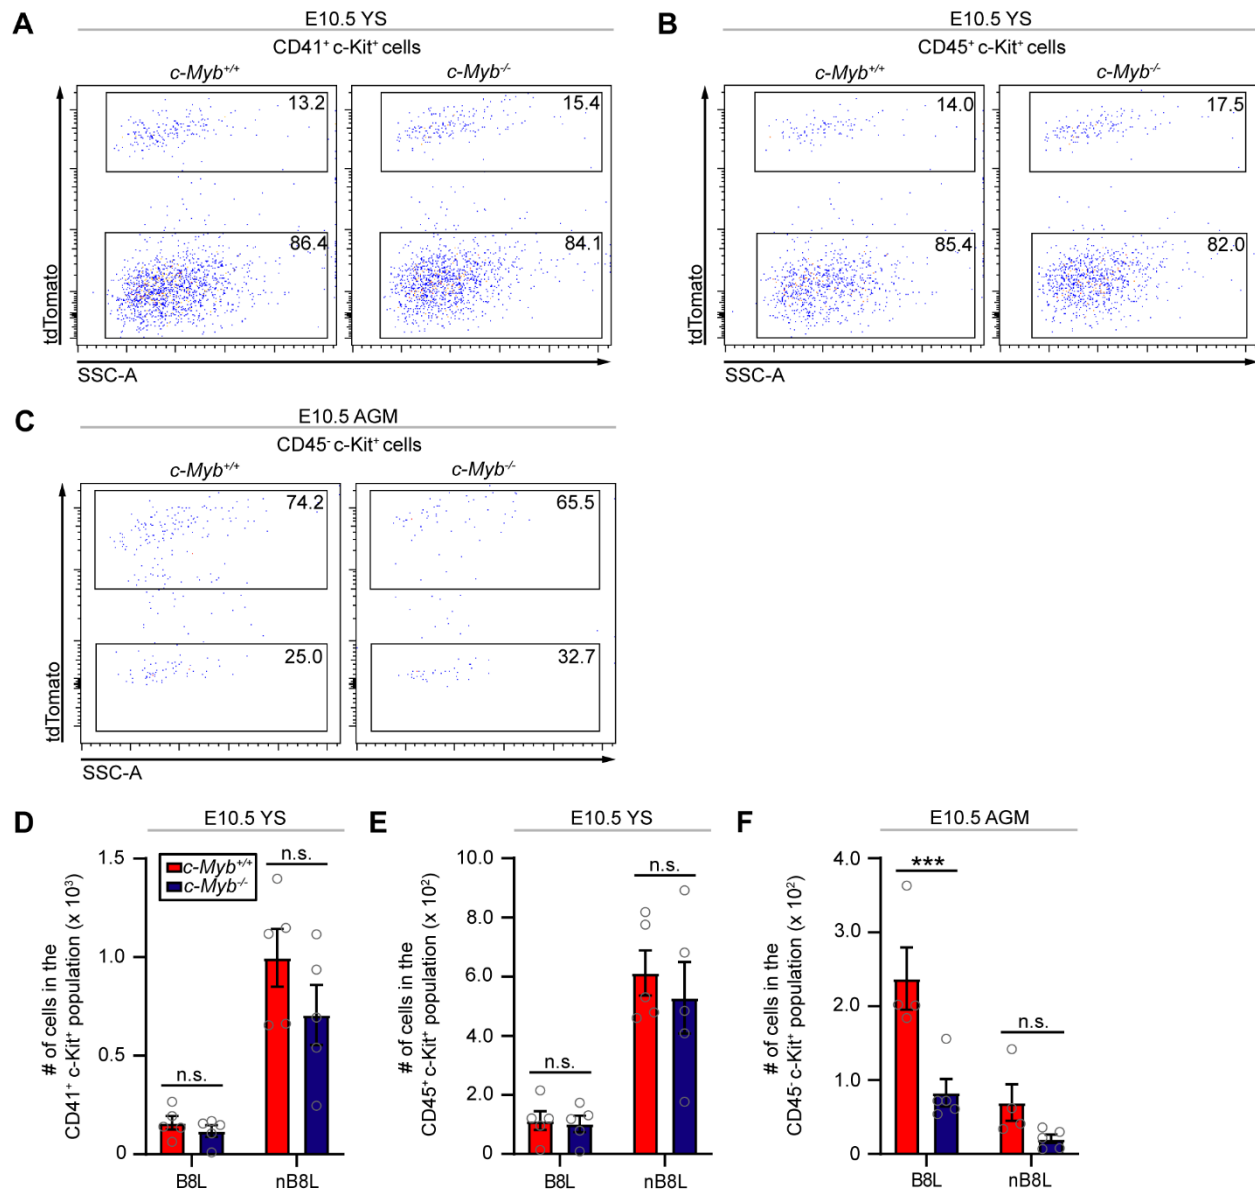

**Fig. S3. AGM-derived *Hoxb8* hematopoietic progenitors require *c-Myb* function. (A-C)**

Representative flow cytometry plots showing (A) CD41<sup>+</sup> c-Kit<sup>+</sup> and (B) CD45<sup>+</sup> c-Kit<sup>+</sup> cells in yolk sac (YS) and (C) CD45<sup>-</sup> c-Kit<sup>+</sup> cells in AGM gated for tdTomato in E10.5 *c-Myb*<sup>+/+</sup> and *c-Myb*<sup>-/-</sup> embryos. (D-F) Number of *Hoxb8* lineage (B8L) and non-*Hoxb8* lineage (nB8L) cells in the (D) CD41<sup>+</sup> c-Kit<sup>+</sup> population in yolk sac (n=5 biological replicates per group, 2-way ANOVA with posthoc analysis comparing *c-Myb*<sup>+/+</sup> – *c-Myb*<sup>-/-</sup> in B8L: *p*=0.9761 and nB8L: *p*=0.3868), (E) CD45<sup>+</sup> c-Kit<sup>+</sup> populations in yolk sac (n=5 biological replicates per group, 2-way ANOVA with posthoc analysis comparing *c-Myb*<sup>+/+</sup> – *c-Myb*<sup>-/-</sup> in B8L: *p*=0.9943 and nB8L: *p*=0.7389), and (F) CD45<sup>-</sup> c-Kit<sup>+</sup> population in AGM (2-way ANOVA with posthoc analysis

comparing *c-Myb*<sup>+/+</sup> (n=4 biological replicates) – *c-Myb*<sup>-/-</sup> (n=5 biological replicates) in B8L: *p*=0.0176 and nB8L: *p*=0.6739) from E10.5 *c-Myb*<sup>+/+</sup> and *c-Myb*<sup>-/-</sup> embryos. Gray circles represent individual data points. Data are represented as mean±sem. n.s. non-significant, \*\*\**p*<0.001. Data represented in all graphs are from three to four independent experiments.

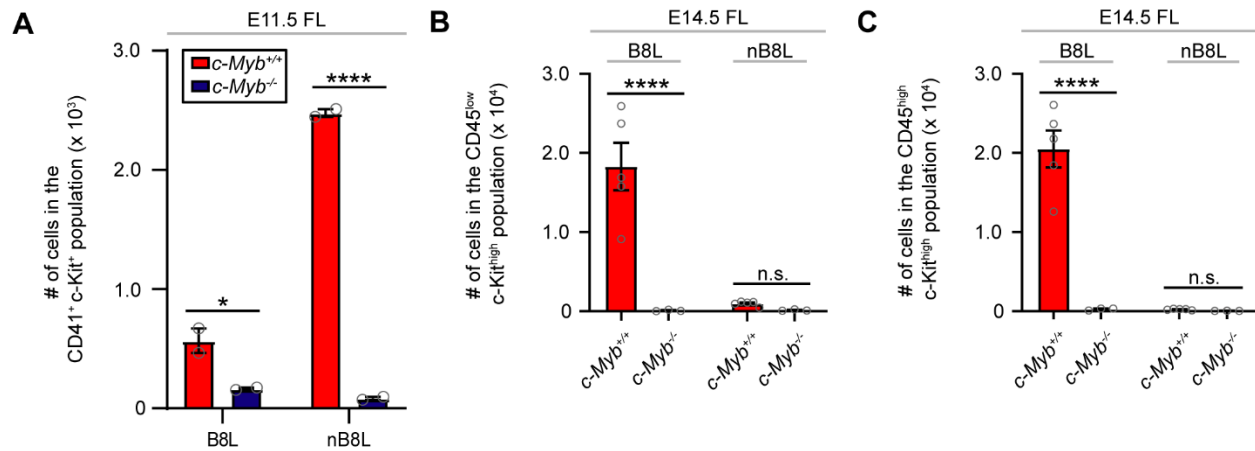

**Fig. S4. The absence of *c-Myb* function in fetal liver disrupts the propagation of maturing hematopoietic progenitors.** (A) Number of *Hoxb8* lineage (B8L) and non-*Hoxb8* lineage (nB8L) cells in the CD41<sup>+</sup> c-Kit<sup>+</sup> population in fetal liver (FL) of E11.5 *c-Myb*<sup>+/+</sup> and *c-Myb*<sup>-/-</sup> embryos. n=2 biological replicates per group; 2-way ANOVA with posthoc analysis comparing *c-Myb*<sup>+/+</sup> – *c-Myb*<sup>-/-</sup> in B8L:  $p=0.0124$  and nB8L:  $p<0.0001$ . (B) Number of B8L and nB8L cells in the CD45<sup>low</sup> c-Kit<sup>high</sup> population in fetal liver of E14.5 *c-Myb*<sup>+/+</sup> and *c-Myb*<sup>-/-</sup> embryos. 2-way ANOVA with posthoc analysis comparing *c-Myb*<sup>+/+</sup> (n=5 biological replicates) – *c-Myb*<sup>-/-</sup> (n=3 biological replicates) in B8L:  $p<0.0001$  and nB8L:  $p=0.9481$ . (C) Number of B8L and nB8L cells in the CD45<sup>high</sup> c-Kit<sup>high</sup> population in fetal liver of E14.5 *c-Myb*<sup>+/+</sup> and *c-Myb*<sup>-/-</sup> embryos. 2-way ANOVA with posthoc analysis comparing *c-Myb*<sup>+/+</sup> (n=5 biological replicates) – *c-Myb*<sup>-/-</sup> (n=3 biological replicates) in B8L:  $p<0.0001$  and nB8L:  $p=0.9963$ . Gray circles are individual data points. Data are represented as mean $\pm$ sem. n.s. non-significant, \* $p<0.05$ , \*\*\*\* $p<0.0001$ . Data represented in all graphs are from two to three independent experiments per time point.

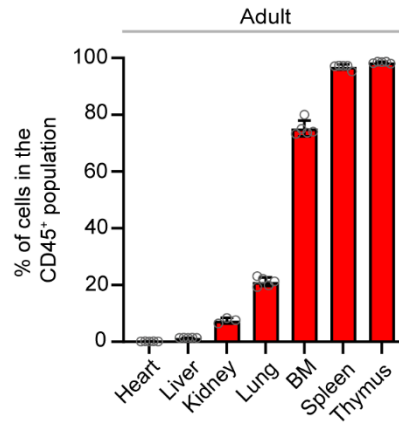

**Fig. S5. *Hoxb8* CD45<sup>+</sup> hematopoietic cells are concentrated in adult**

**hematopoietic/lymphoid tissues.** Graph showing the percentage of live Ter119<sup>-</sup> CD45<sup>+</sup> *Hoxb8*-tdTomato<sup>+</sup> hematopoietic cells in examined tissues of 2-3-month-old mice. n=5 biological replicates (Heart), n=5 biological replicates (Liver), n=3 biological replicates (Kidney), n=5 biological replicates (Lung), n=5 biological replicates (Bone marrow: BM), n=5 biological replicates (Spleen), n=5 biological replicates (Thymus). Data are represented as mean±sem. Data represented in all graphs are from two to four independent experiments per time point.



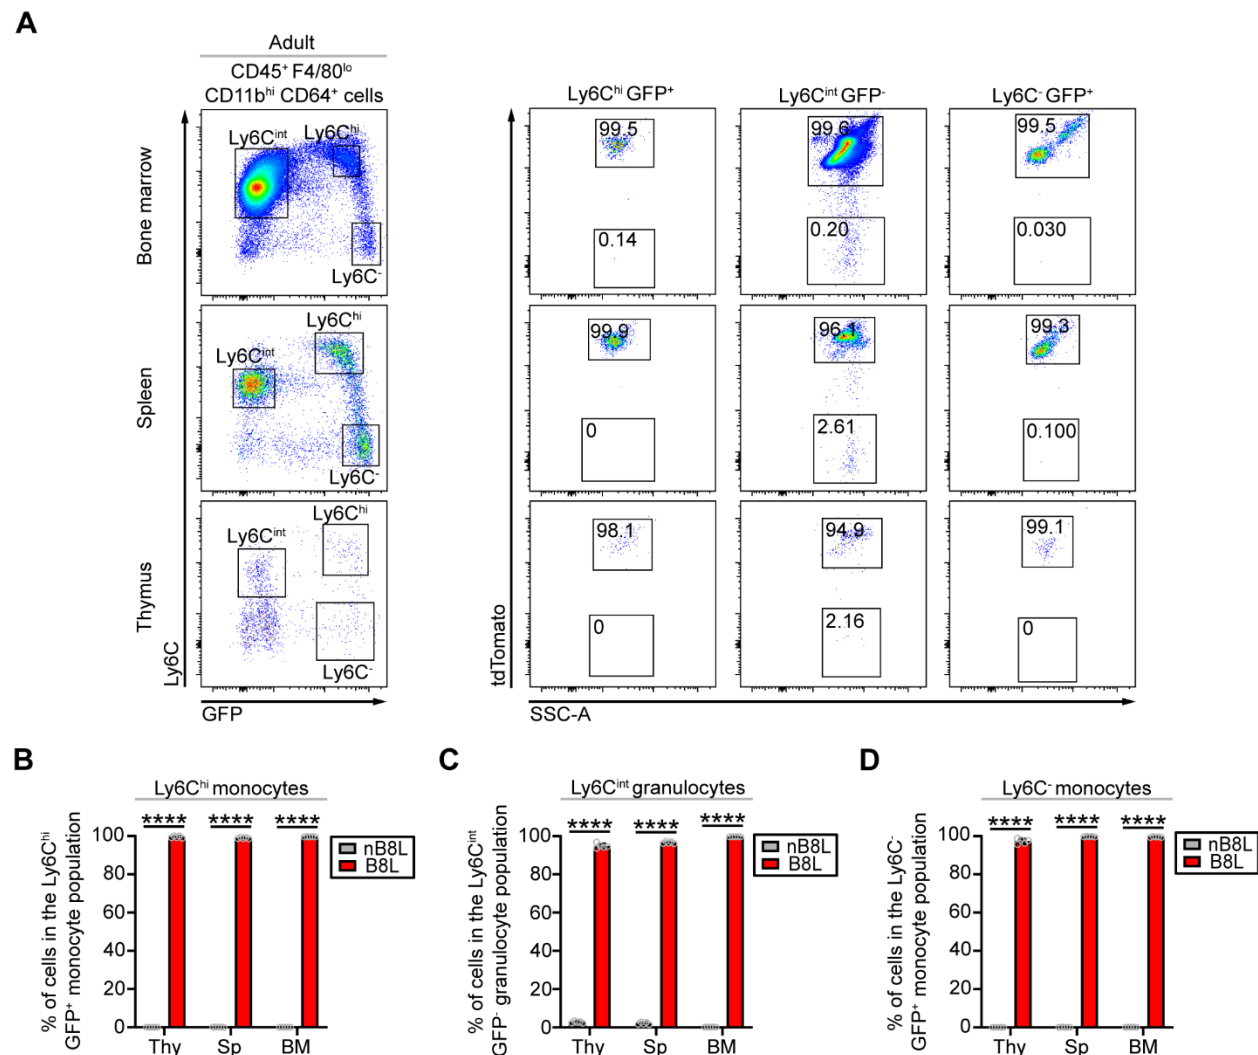

**Fig. S6. Inflammatory and patrolling monocytes, including granulocytes, in adult tissues of hematopoiesis/lymphopoiesis, are descendants of *Hoxb8*-expressing precursors. (A)**

Representative flow cytometry plots examining tdTomato<sup>+</sup> cells in the inflammatory (CD45<sup>+</sup> F4/80<sup>lo</sup> CD11b<sup>hi</sup> CD64<sup>+</sup> *Cx3cr1*-GFP<sup>+</sup> Ly6C<sup>hi</sup>) and patrolling (CD45<sup>+</sup> F4/80<sup>lo</sup> CD11b<sup>hi</sup> CD64<sup>+</sup> *Cx3cr1*-GFP<sup>+</sup> Ly6C<sup>-</sup>) monocyte populations, and the granulocyte population (CD45<sup>+</sup> F4/80<sup>lo</sup> CD11b<sup>hi</sup> CD64<sup>+</sup> *Cx3cr1*-GFP<sup>-</sup> Ly6C<sup>int</sup>) from bone marrow, spleen, and thymus of 2-3-month-old mice. **(B-D)** Percentage of *Hoxb8* lineage (B8L) and non-*Hoxb8* lineage (nB8L) cells in the **(B)** Ly6C<sup>hi</sup> inflammatory monocyte, **(C)** Ly6C<sup>int</sup> granulocyte, and **(D)** Ly6C<sup>-</sup> patrolling monocyte populations in thymus (Thy), spleen (Sp), and bone marrow (BM). n=5 biological replicates. 2-

way ANOVA with posthoc analysis comparing nB8L cells – B8L cells in each tissue examined:  $p < 0.0001$ . Gray circles are individual data points. Data are represented as mean  $\pm$  sem.

\*\*\* $p < 0.0001$ . Data represented in all graphs are from two to four independent experiments per time point.

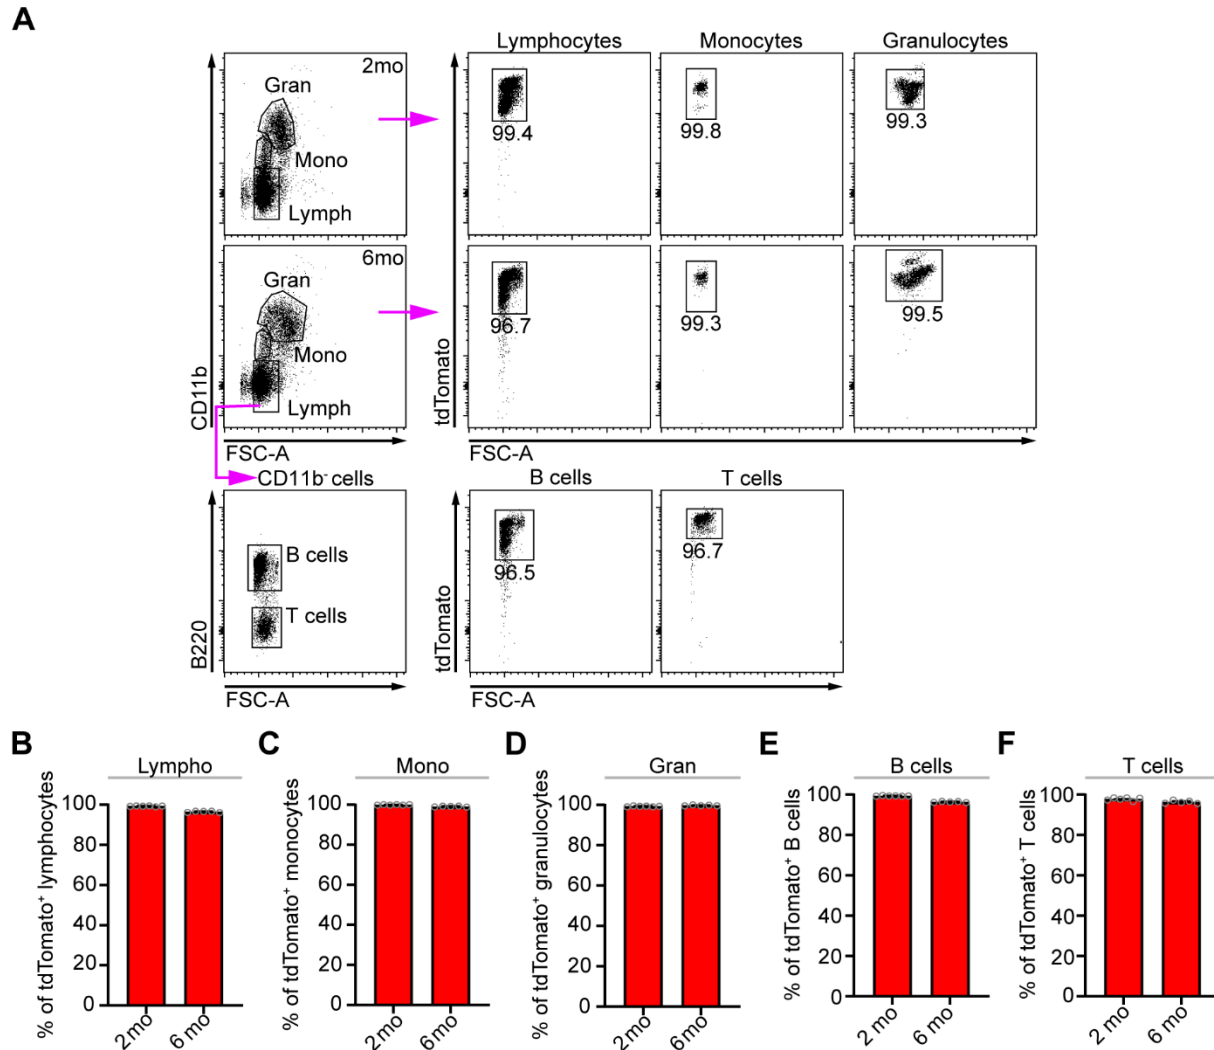

**Fig. S7. All blood immune cells are derived from the *Hoxb8* lineage.** (A) Representative flow cytometry plots showing the frequencies of white blood cells (CD11b<sup>lo</sup> lymphocytes: Lymph, CD11b<sup>lo</sup> monocytes: Mono, CD11b<sup>hi</sup> granulocytes: Gran) from 2-month and 6-month-old adult mice. Lymphocytes were further gated for B220 to examine B cells (CD11b<sup>lo</sup> B220<sup>+</sup>) and T cells (CD11b<sup>lo</sup> B220<sup>-</sup>) followed by gating for tdTomato. (B-D) Percentage of tdTomato<sup>+</sup> (B) lymphocytes, (C) monocytes, and (D) granulocytes in adult blood. n=6 biological replicates (2-months-old) and n=5 biological replicates (6-months-old). (E-F) Percentage of tdTomato<sup>+</sup> cells in the (E) B cell and (F) T cell populations of adult mice. n=6 biological replicates (2-months-old) and n=5 biological replicates (6-months-old). Data are represented as mean±sem. Data represented in all graphs are from two to four independent experiments per time point.

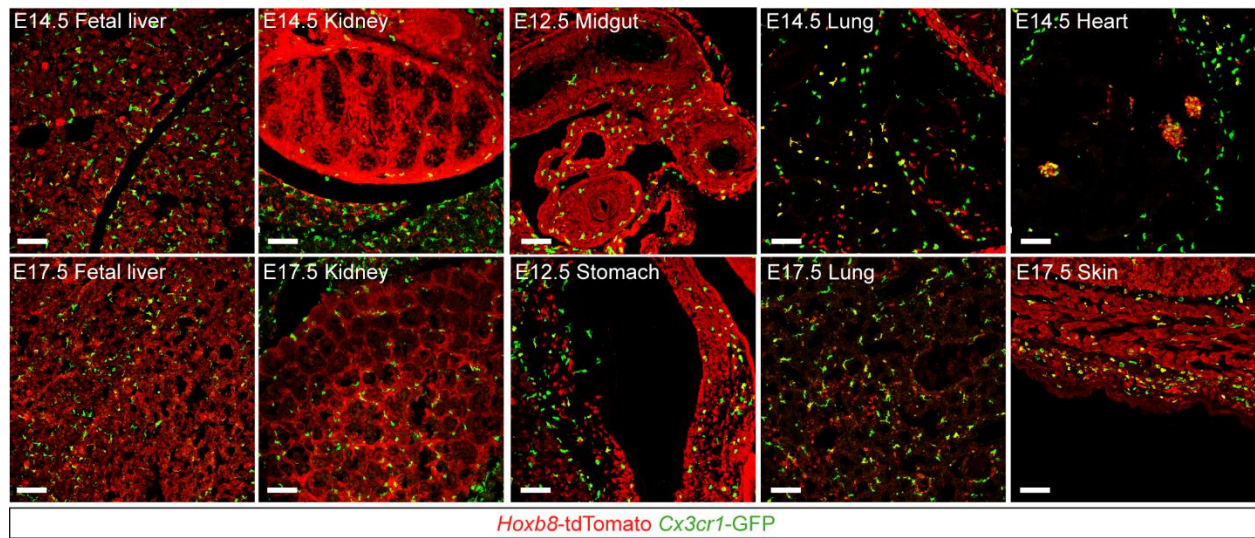

**Fig. S8. Development of *Hoxb8* lineage and non-*Hoxb8* lineage fetal macrophages.**

Micrographs of sections from embryonic tissues showing *Cx3cr1*-GFP and *Hoxb8*-tdTomato signals. Scale bar: 50µm. n=3 biological replicates per time point.

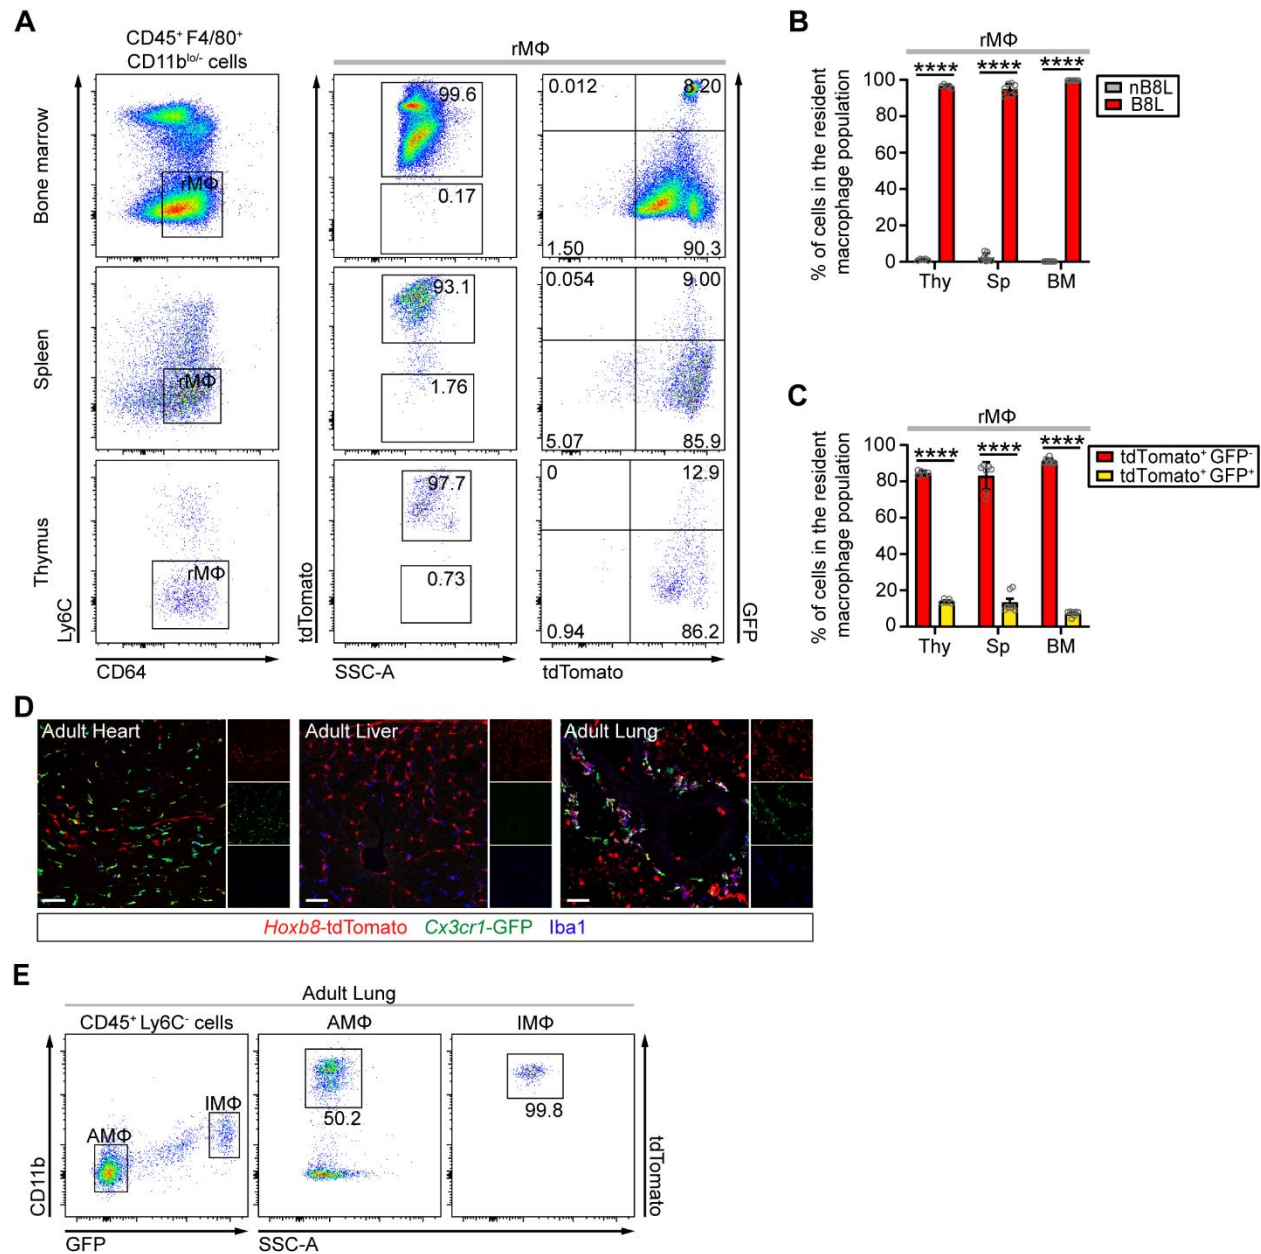

**Fig. S9. *Hoxb8* tissue-resident macrophages are largely found in tissues undergoing active hematopoiesis/lymphopoiesis.** (A) Representative flow cytometry plots examining total tdTomato (SSC-A vs. tdTomato) or tdTomato and GFP (tdTomato vs. GFP) signals in the resident (rMΦ: CD45<sup>+</sup> F4/80<sup>+</sup> CD11b<sup>lo/-</sup> CD64<sup>+</sup> Ly6C<sup>-</sup>) macrophage populations from bone marrow, spleen, and thymus of 2-3-month-old adult mice. (B-C) Percentage of (B) *Hoxb8* lineage (B8L) and non-*Hoxb8* lineage (nB8L) cells and (C) tdTomato<sup>+</sup> GFP<sup>-</sup> and tdTomato<sup>+</sup> GFP<sup>+</sup> cells in the rMΦ population of 2-3-month-old mice. Thymus (n=5 biological replicates),

spleen and bone marrow (n=7 biological replicates). **(B)** 2-way ANOVA with posthoc analysis comparing nB8L cells – B8L cells in each tissue examined,  $p<0.0001$ . **(C)** 2-way ANOVA with posthoc analysis comparing tdTomato<sup>+</sup> GFP<sup>-</sup> cells – tdTomato<sup>+</sup> GFP<sup>+</sup> cells in the rMΦ population in each tissue examined:  $p<0.0001$ . **(D)** Micrographs of sections from non-hematopoietic tissues (heart, liver, lung) of 2-3-month-old mice showing *Cx3cr1*-GFP, *Hoxb8*-tdTomato, and Iba1 signals. Scale bar: 50μm. n=3 biological replicates. **(E)** Representative flow cytometry plots showing alveolar (AMΦ: CD45<sup>+</sup> Ly6C<sup>-</sup> CD11b<sup>-</sup> *Cx3cr1*-GFP<sup>-</sup>) and interstitial (IMΦ: CD45<sup>+</sup> Ly6C<sup>-</sup> CD11b<sup>+</sup> *Cx3cr1*-GFP<sup>+</sup>) macrophage populations gated for tdTomato in lungs of 2-3-month-old mice. Gray circles are individual data points. Data are represented as mean±sem. \*\*\*\* $p<0.0001$ . Data represented in all graphs are from two to four independent experiments per time point.

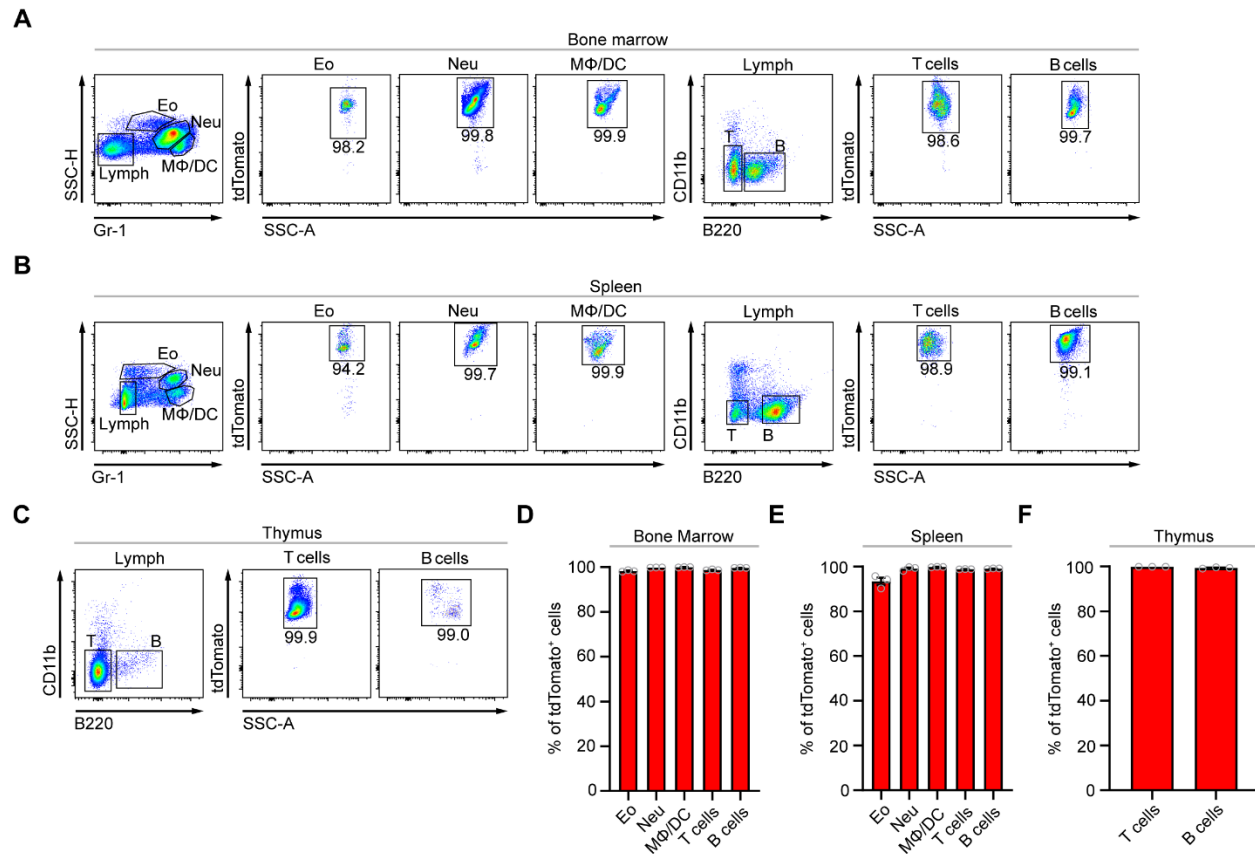

**Fig. S10. Innate and adaptive immune cells in tissues of active hematopoiesis/lymphopoiesis are exclusively descendants of the *Hoxb8*-expressing precursors.** (A-C) Representative flow cytometry plots examining tdTomato<sup>+</sup> cells in the eosinophil (Eo) (Gr-1<sup>low/-</sup>), neutrophil (Neu) (Gr-1<sup>med</sup>), macrophage/dendritic cell (MΦ/DC) (Gr-1<sup>hi</sup>), and lymphocyte (Lymph) (Gr-1<sup>-</sup>) populations isolated from (A) bone marrow, (B) spleen, and (C) thymus of 2-3-month-old mice. Gr-1<sup>-</sup> lymphocytes were further examined for tdTomato detection in T cells (T) (CD11b<sup>-</sup> B220<sup>-</sup>) and B cells (B) (CD11b<sup>-</sup> B220<sup>+</sup>). (D-F) Percentage of tdTomato<sup>+</sup> cells in each immune cell population examined in (D) bone marrow, (E) spleen, and (F) thymus. n=3 biological replicates. Gray circles represent individual data points. Data are represented as mean±sem. Data represented in all graphs are from two independent experiments.
